# Supplementary material for: A simple colorimetric and fluorescent probe with high selectivity towards cysteine over homocysteine and glutathione
Source: Royal Society of Chemistry journal article supplement (doi:10.1039/c6ra28829d), 2017-01-01
Supplement: c6ra28829d1.pdf [file c6ra28829d1.pdf]

## Supplementary Information

### Simple colorimetric and fluorescent probe with high selectivity towards cysteine over homocysteine and glutathione

Jing Guo,<sup>a</sup> Ziyu Kuai,<sup>b</sup> Zhixiang Zhang,<sup>c</sup> Qingbiao Yang<sup>\*a</sup>, Yaming Shan<sup>\*b</sup>, and Yaoxian Li<sup>a</sup>

<sup>a</sup> College of Chemistry, Jilin University, Changchun 130021, P. R. China. Fax: +86-431-88499576; Tel: +86-431-88499576

E-mail: [yangqb@jlu.edu.cn](mailto:yangqb@jlu.edu.cn)

<sup>b</sup> National Engineering Laboratory for AIDS Vaccine, College of Life Sciences, Jilin University, Changchun 130021, P. R. China. Fax: +86-431-

85167751; Tel: +86-431-89228979

E-mail: [shanyam@jlu.edu.cn](mailto:shanyam@jlu.edu.cn)

<sup>c</sup> Institute of Theoretical Chemistry, Jilin University, Changchun 130021, P. R. China.

## Table of contents

|           | page |
|-----------|------|
| Figure S1 | 3    |
| Figure S2 | 4    |
| Figure S3 | 4    |
| Figure S4 | 4    |
| Figure S5 | 5    |
| Figure S6 | 5    |
| Table 1   | 6    |
| Table 2   | 6    |

## Characterization of AQDA

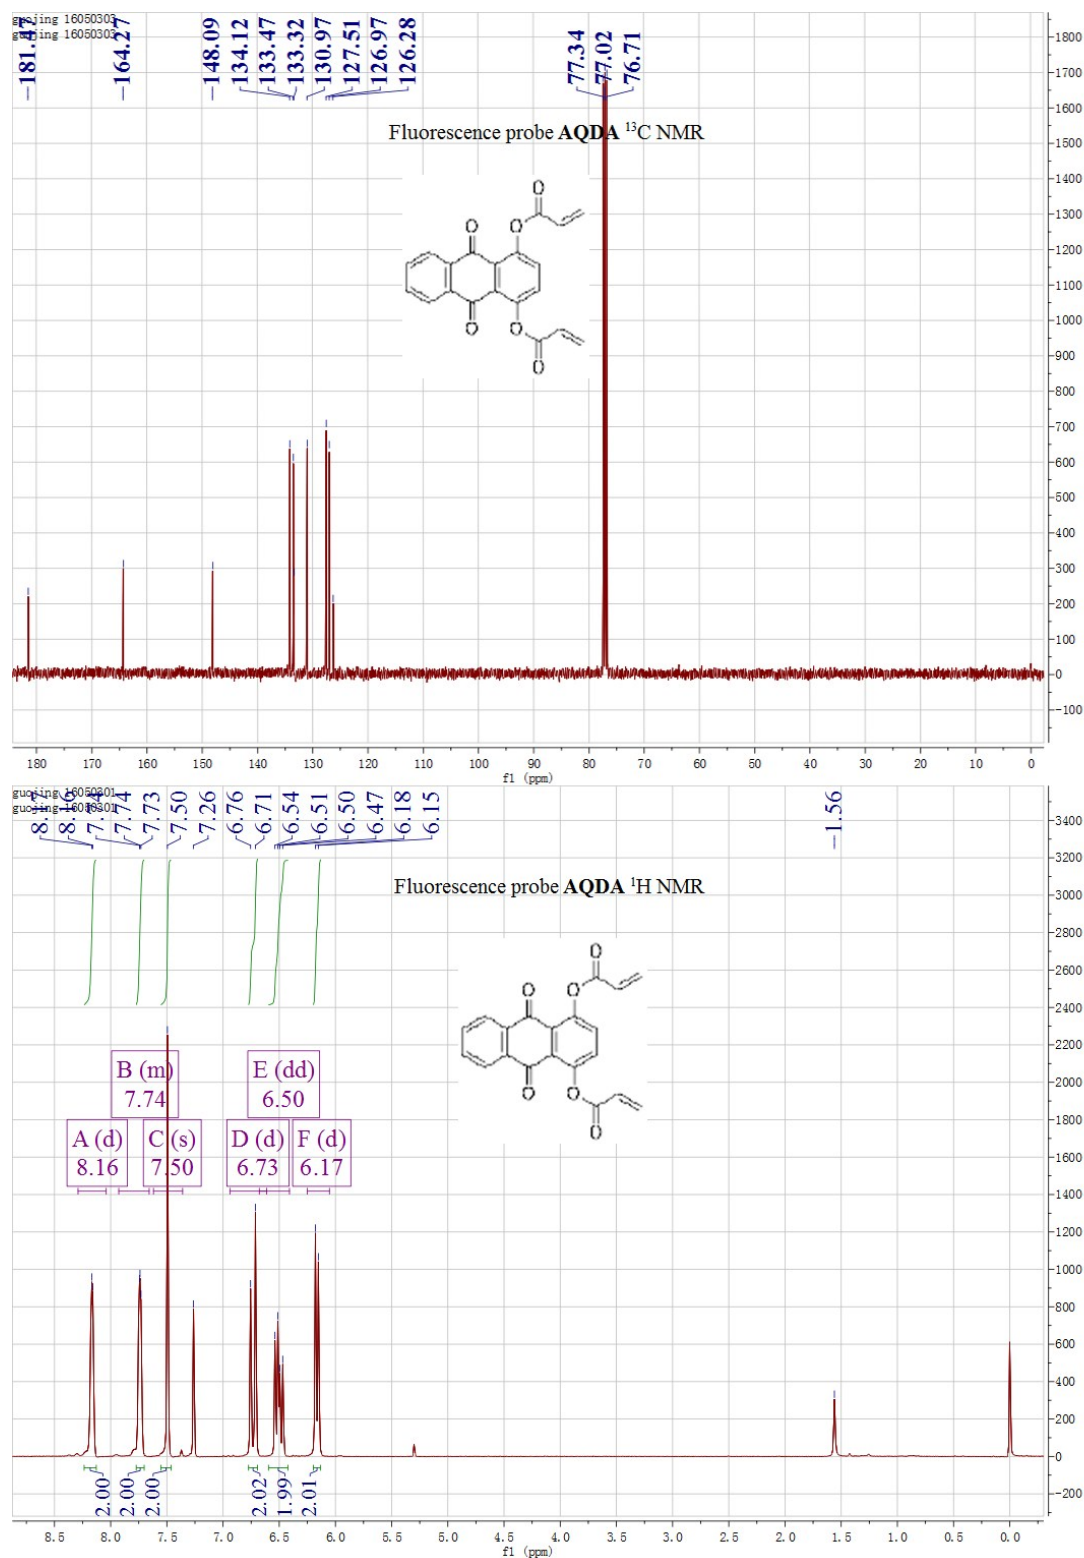

Figure S1  $^1\text{H}$  NMR spectrum of probe AQDA in  $\text{CDCl}_3$ ; (above)  $^{13}\text{C}$  NMR spectrum of the probe in  $\text{CDCl}_3$ . (bottom)

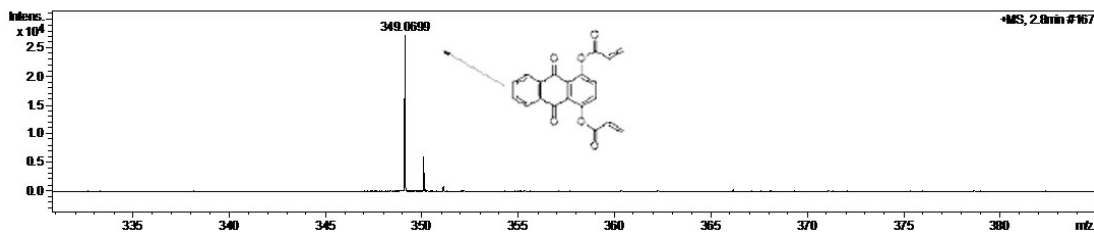

**Figure S2** High-resolution mass spectra of the AQDA

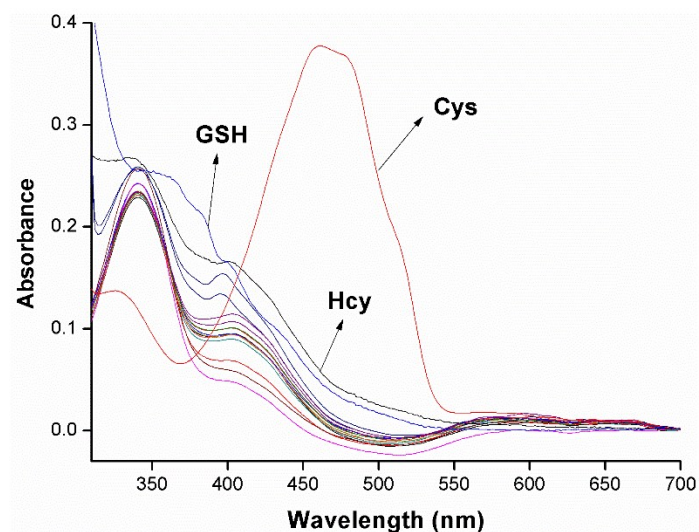

**Figure S3** Absorption spectra of AQDA (50  $\mu$ M) in the presence of Cys (5 equiv.), and other amino acids (50 equiv.). (including His, Ala, Asn, Asp, Gln, Arg, Glu, Met, Phe, Trp, Tyr, Lys, Ser, Hcy, GSH).

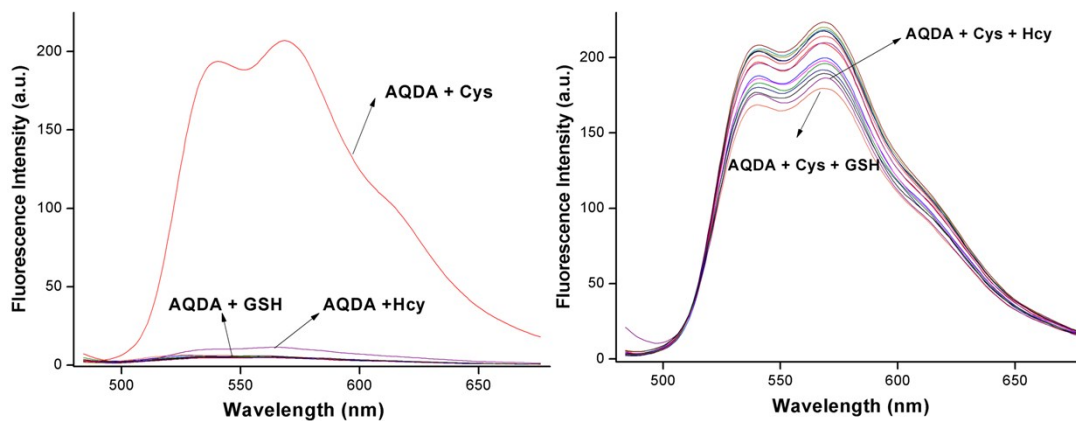

**Figure S4** (left) Fluorescence spectra of AQDA (10  $\mu$ M) in the presence of Cys (5 equiv.), Hcy (50 equiv.), GSH (500 equiv.) and other amino acids (50 equiv.). (including His, Ala, Asn, Asp, Gln, Arg, Glu, Met, Phe, Trp, Tyr, Lys and Ser) (right) Fluorescence spectra of the sensor (10  $\mu$ M) towards Cys (5 equiv.) in addition of other amino acids (50 equiv.) (His, Ala, Asn, Asp, Gln, Arg, Glu, Met, Phe, Trp, Tyr, Lys, Ser, Hcy and GSH)

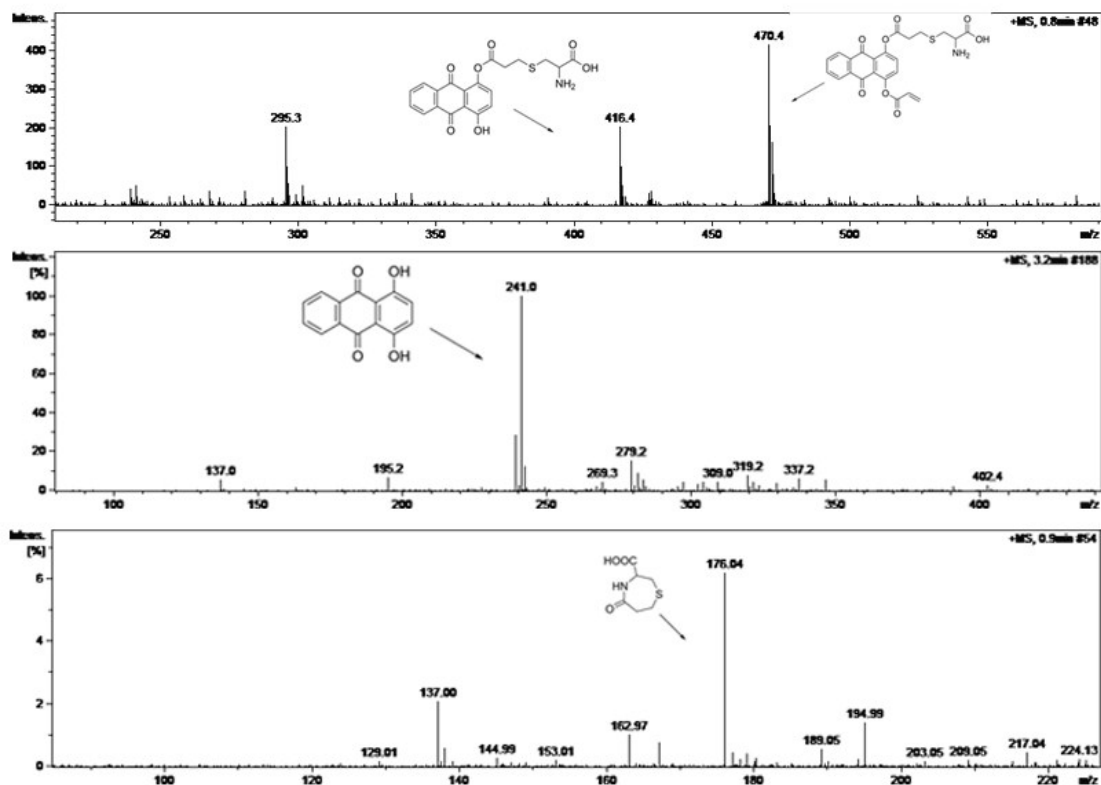

**Figure S5** Mass spectra of the conjugate addition adducts, hydrolyzation intermediates of AQDA with the addition of Cys (above). Mass spectra of the end product of AQDA treated with Cys (middle). Mass spectra of the lactam ring (bottom).

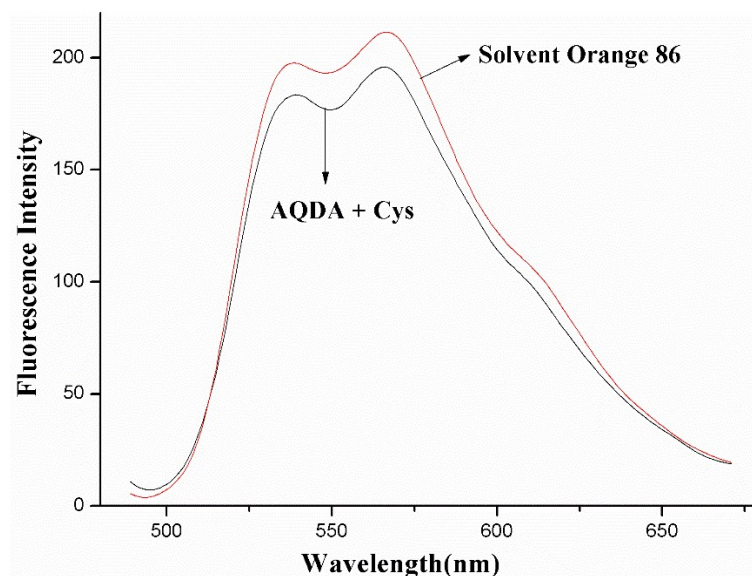

**Figure S6** Fluorescence spectra of AQDA ( $1 \times 10^{-5}$  M) with Cys (5 equiv.) and compound **3** ( $1 \times 10^{-5}$  M) in HEPES buffer solution (ACN/HEPES = 2:8, pH 7.4,  $\lambda_{ex}$  = 470 nm, slit: 5.0 nm/5.0 nm).

**Table 1:** Summary of fluorescent probes for Cys

| Probe | $\lambda_{\text{ex}}/\lambda_{\text{em}}$ | LOD                 | Ref.      |
|-------|-------------------------------------------|---------------------|-----------|
| -     | 420/492                                   | 0.9 $\mu\text{M}$   | [16c]     |
| -     | 440/525                                   | 7.62 $\mu\text{M}$  | [16d]     |
| NQ    | 370/536                                   | 0.5 $\mu\text{M}$   | [18c]     |
| ACA   | 420/456                                   | 0.657 $\mu\text{M}$ | [18e]     |
| CAA   | 380/490                                   | 0.192 $\mu\text{M}$ | [20]      |
| AQDA  | 470/565                                   | 0.16 $\mu\text{M}$  | this work |

**Table 2:** Electron transition configurations, excitation energies, and oscillator strengths (f) for main band of **Compound 3** and **AQDA**

|                   | State                 | Marjor contrib. <sup>a</sup> | Energy   | f      | Exp |
|-------------------|-----------------------|------------------------------|----------|--------|-----|
| <b>Compound 3</b> | $S_0 \rightarrow S_1$ | H $\rightarrow$ L (99.3%)    | 485/2.55 | 0.3170 | 470 |
|                   | $S_0 \rightarrow S_2$ | H-2 $\rightarrow$ L (97.2%)  | 341/3.63 | 0.0938 | 370 |
|                   | $S_1 \rightarrow S_0$ | L $\rightarrow$ H (100%)     | 572/2.17 | 0.3140 | 565 |
| <b>AQDA</b>       | $S_0 \rightarrow S_1$ | H $\rightarrow$ L (66.2%)    | 422/2.94 | 0.0030 | 410 |
|                   | $S_0 \rightarrow S_2$ | H-1 $\rightarrow$ L (33.7%)  | 354/3.50 | 0.2488 | 340 |
|                   | $S_1 \rightarrow S_0$ | L $\rightarrow$ H (96.2%)    | 479/2.59 | 0.0004 | -   |

<sup>a</sup> 'H' means HOMO and 'L' means LUMO
